# Supplementary material for: A Novel RP-UHPLC-MS/MS Approach for the Determination of Tryptophan Metabolites Derivatized with 2-Bromo-4′-Nitroacetophenone
Source: MDPI journal article supplement (doi:10.3390/biomedicines12051003), 2024-05-02

## Supplementary material

**Figure S1** Illustration of BNAP derivatization optimization of **A**: temperature; **B**: time; **C**: concentration of BNAP and **D**: volume of BNAP.

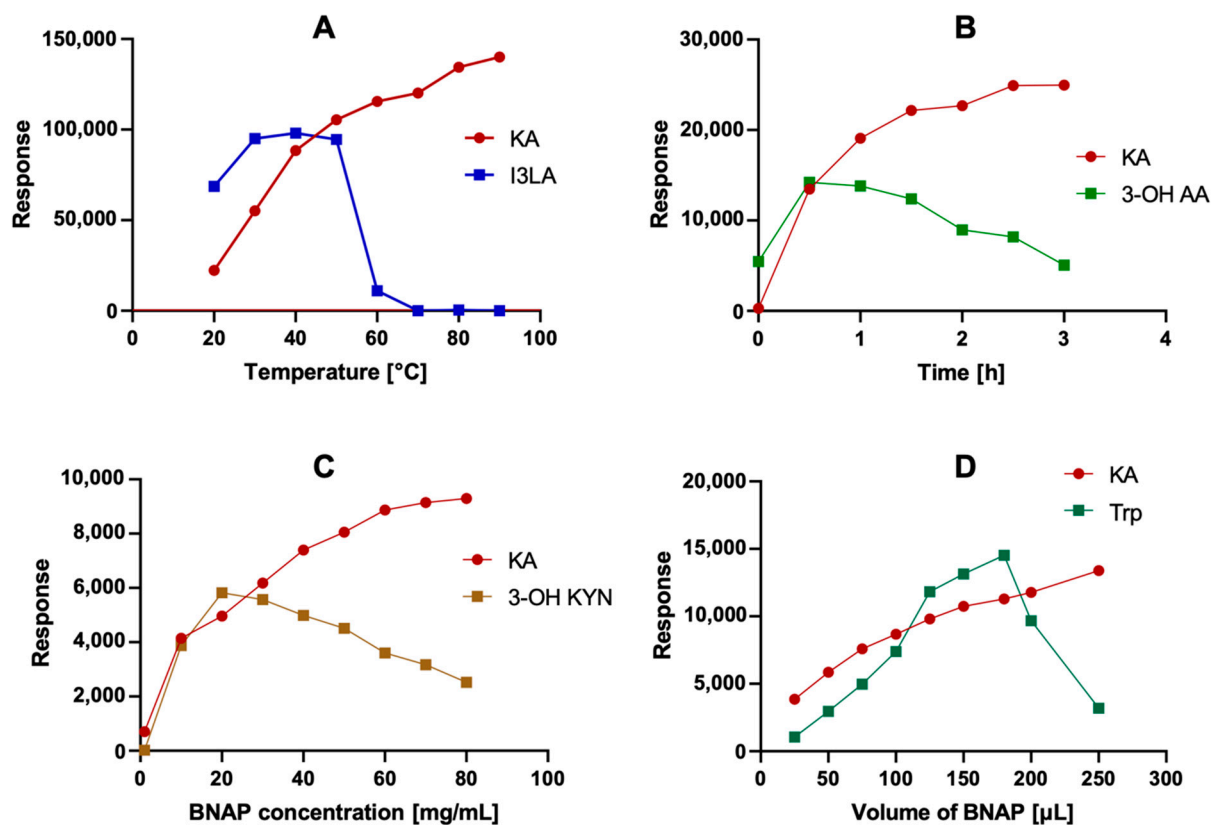

**Table S1** Chose of suitable stationary phase and optimization of mobile phase and column temperature evaluation based on tailing factors ( $T_F$ ) of three representative derivatives 5-OH IAA, I3LA and QA.  $T_F$  are presented as mean value of three measurements.

| Column              | Tailing factor ( $T_F$ ) |      |                |
|---------------------|--------------------------|------|----------------|
|                     | 5-OH IAA                 | I3LA | QA             |
| HSS T3 (2.1×100 mm) | 1.06                     | 1.85 | 1.15           |
| CSH C18             | 0.69                     | 1.49 | 1.75           |
| CORTECS C18+        | 0.76                     | 0.93 | 1.33           |
| Kinetex F5          | 1.58                     | 1.58 | peak splitting |
| HSS T3 (2.1×50 mm)  | 1.10                     | 0.81 | 1.58           |

  

| Mobile phase              | Tailing factor ( $T_F$ ) |      |      |
|---------------------------|--------------------------|------|------|
|                           | 5-OH IAA                 | I3LA | QA   |
| 0.1% FA (pH 2.5)          | 1.06                     | 1.62 | 1.15 |
| 0.1% FA (pH 3)            | 0.88                     | 1.70 | 1.42 |
| 0.1% FA (pH 4)            | 0.94                     | 1.93 | 1.25 |
| 0.15 FA + 10 mM AF (pH 3) | 0.82                     | 1.69 | 1.50 |
| 0.5% FA (pH 2.2)          | 1.00                     | 2.10 | 1.50 |

  

| Column temperature [°C] | Tailing factor ( $T_F$ ) |      |      |
|-------------------------|--------------------------|------|------|
|                         | 5-OH IAA                 | I3LA | QA   |
| 30                      | 1.06                     | 1.85 | 1.10 |
| 35                      | 0.98                     | 2.44 | 1.10 |
| 40                      | 1.23                     | 2.12 | 1.69 |

**Figure S2** UHPLC-MS/MS chromatograms (without peak smoothing) of injection volume optimization for three representative derivatives 5-OH IAA, I3LA and QA; **A:** 1  $\mu$ L; **B:** 5  $\mu$ L; **C:** 10  $\mu$ L.

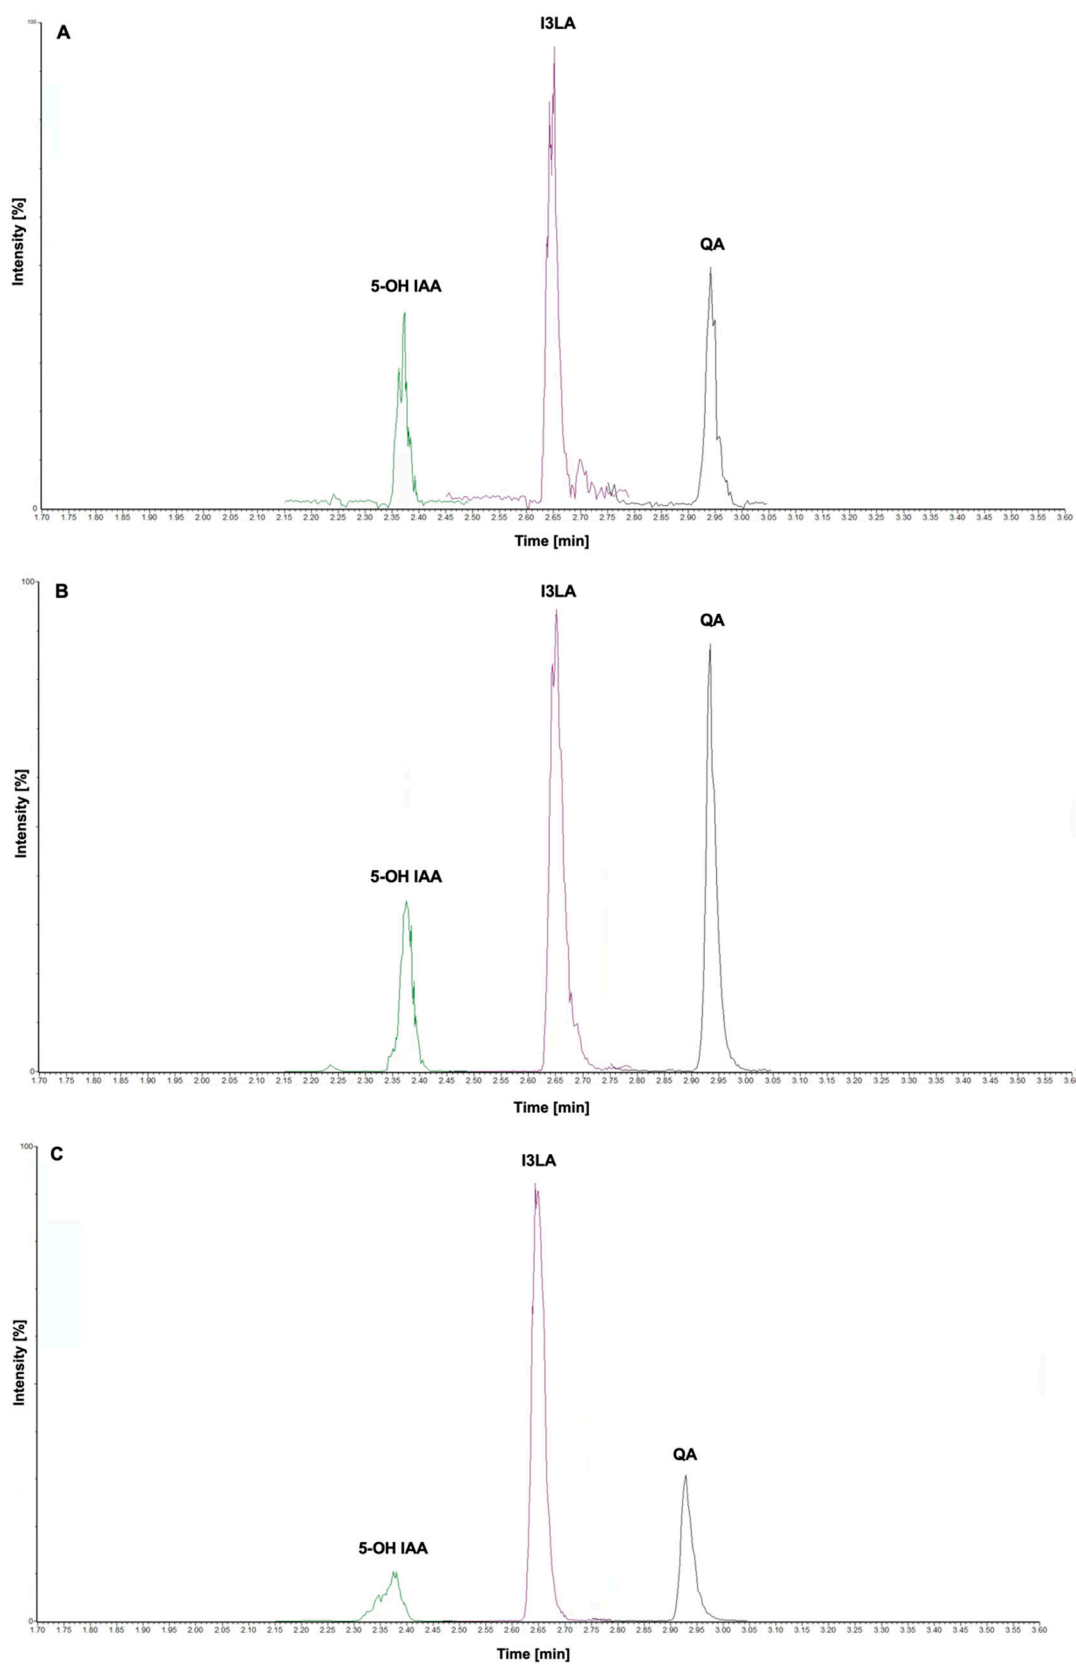

**Figure S3** Statistical evaluation of quantification of Trp metabolites in female (A) and male (B) plasma samples from AD patients and age matched CTRLs \*  $p < 0.05$ ; \*\*  $p < 0.01$ ; \*\*\*  $p < 0.001$ ; ns - nonsignificant.

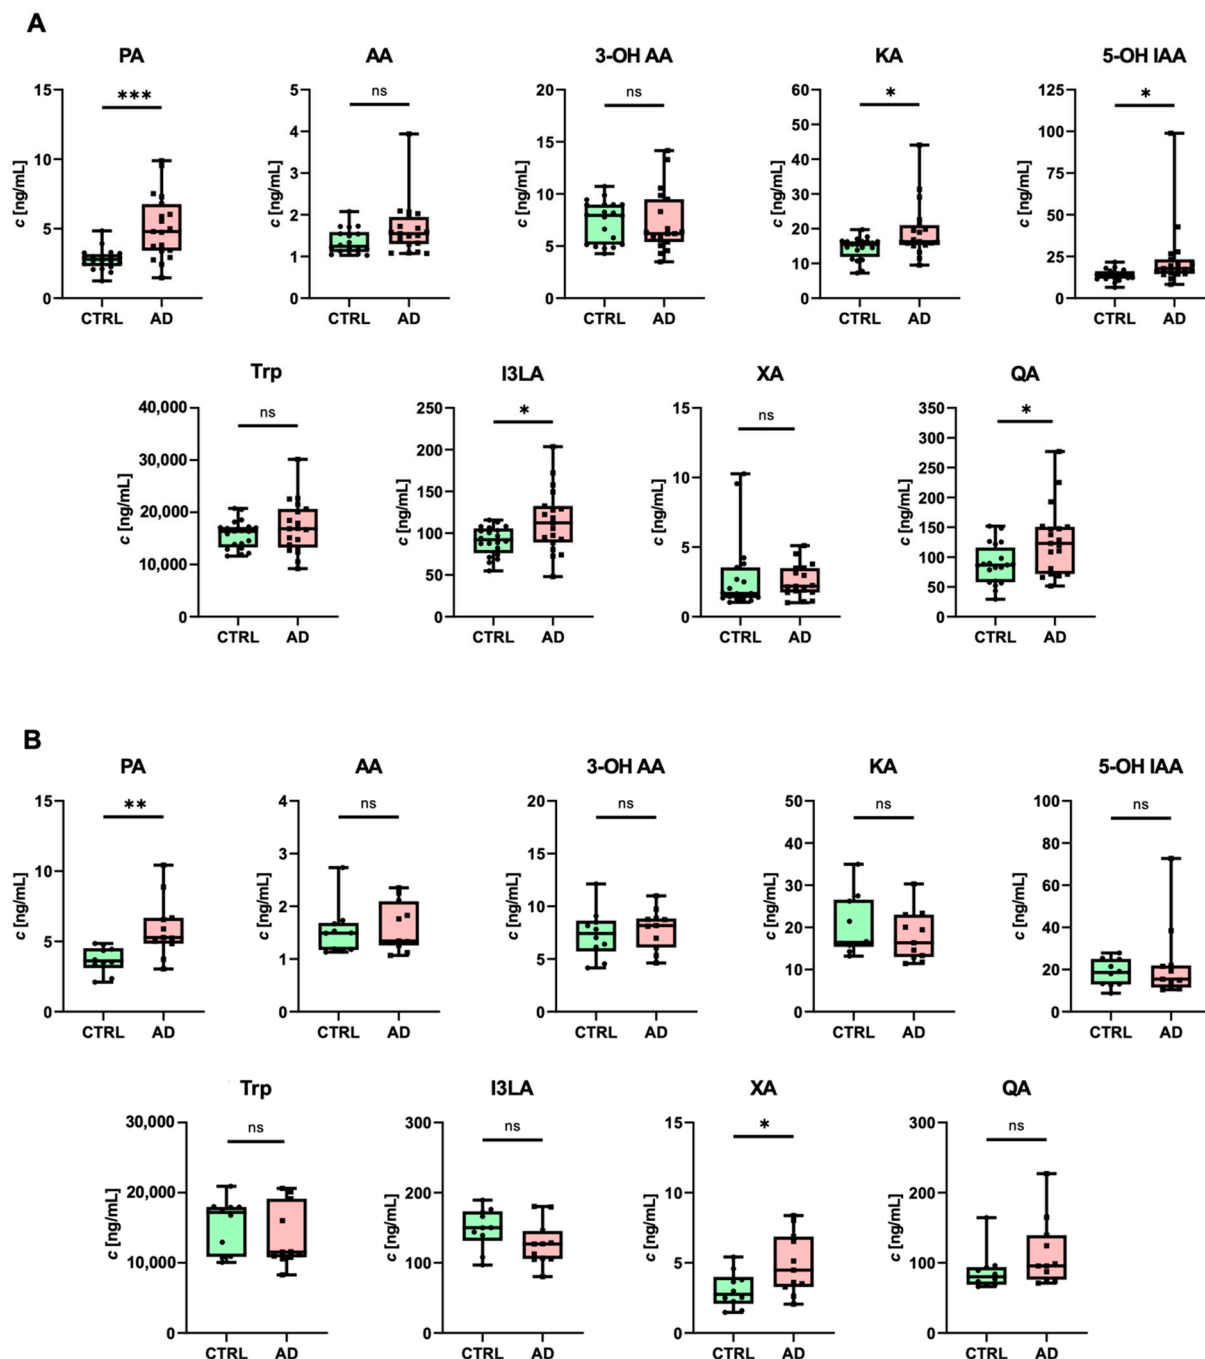

Supplement: s1 [file s1]
